# Supplementary material for: Shape controlled iron oxide nanoparticles: inducing branching and controlling particle crystallinity
Source: Royal Society of Chemistry journal article supplement (doi:10.1039/d0ce01291b), 2020-12-16
Supplement: d0ce01291b1.pdf [file d0ce01291b1.pdf]

## Supporting Information:

### Shape Controlled Iron Oxide Nanoparticles: Inducing Branching and Controlling Particle Crystallinity

Nur Hanisah AbuTalib,<sup>a</sup> Alec P. LaGrow,<sup>\*b</sup> Maximilian O. Besenhard,<sup>c</sup> Oleksandr Bondarchuk,<sup>b</sup> Andreas Sergides,<sup>a</sup> Simone Famiani,<sup>a</sup> Liliana P. Ferreira,<sup>de</sup> M. Margarida Cruz,<sup>e</sup> Asterios Gavrilidis,<sup>c</sup> and Nguyen Thi Kim Thanh<sup>\*a</sup>

<sup>a</sup>Biophysics Group, Department of Physics and Astronomy, University College London, Gower Street, London, WC1E 6BT, UK and UCL Healthcare Biomagnetic and Nanomaterials Laboratories, 21 Albemarle Street, London W1S 4BS, UK. *Email: ntk.thanh@ucl.ac.uk*

<sup>b</sup>International Iberian Nanotechnology Laboratory, Braga, 4715-330, Portugal. *Email: alec.lagrow@inl.int*

<sup>c</sup>Department of Chemical Engineering, University College London, Torrington Place, London, WC1E 7JE, U.K.

<sup>d</sup>Physics Department, University of Coimbra, 3004-516 Coimbra, Portugal

<sup>e</sup>BioISI -Biosystems and Integrative Sciences Institute, Faculdade de Ciências, Universidade de Lisboa, Campo Grande, 1749-016 Lisboa, Portugal

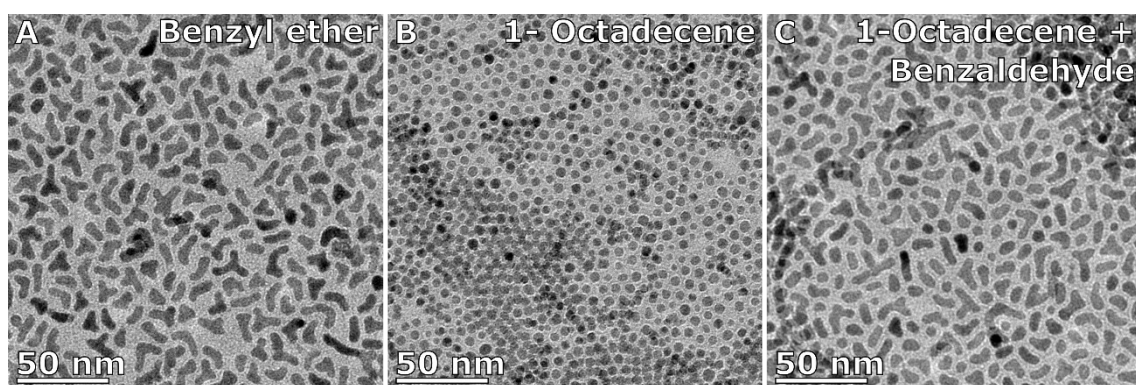

**Fig. S1** TEM images of nanoparticles obtained with various solvents, A) benzyl ether B) 1-octadecene and C) mixture of 1-octadecene and benzaldehyde.

**Table S1** Average size and shapes of nanoparticles formed with increasing OAm eq.

| OAm   | Shape                  | Average Size / nm | Branch Width / nm |
|-------|------------------------|-------------------|-------------------|
| 40 eq | Spheres                | $6 \pm 1$         |                   |
| 25 eq | Branched               | $13 \pm 3$        | $5.3 \pm 0.7$     |
| 23 eq | Branched               | $12 \pm 2$        | $5.5 \pm 0.7$     |
| 21 eq | Branched               | $14 \pm 3$        | $5.6 \pm 0.8$     |
| 19 eq | Branched               | $14 \pm 4$        | $6 \pm 1$         |
| 17 eq | Multiply Branched      | $21 \pm 4$        | $6.6 \pm 0.9$     |
| 15 eq | Multiply Branched      | $17 \pm 3$        | $7 \pm 1$         |
| 13 eq | Multiply Branched      | $29 \pm 4$        | $14 \pm 3$        |
| 10 eq | Anisotropic/Elongated  | $17 \pm 2$        | $12 \pm 2$        |
| 5 eq  | Octahedra/Cuboctahedra | $16 \pm 2$        |                   |
| 0 eq  |                        |                   |                   |

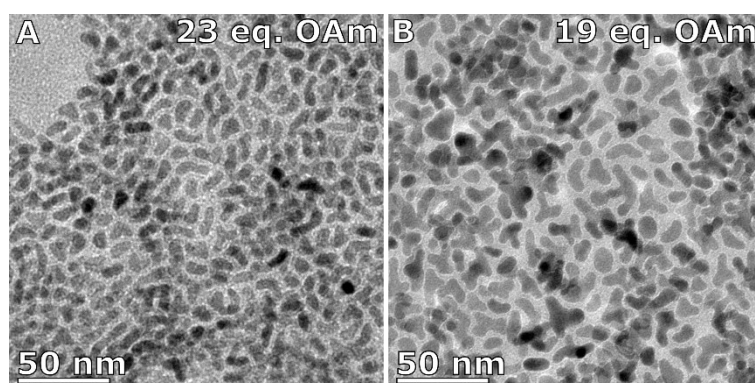

**Fig. S2** TEM images of nanoparticle formed with **A)** 23 eq OAm and **B)** 19 eq OAm.

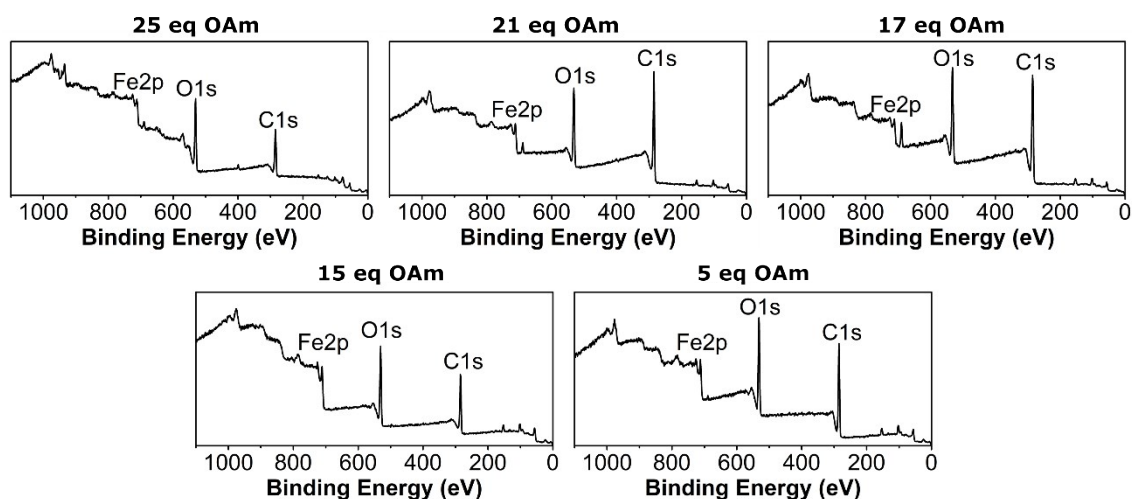

**Fig. S3** XPS survey spectra of IONP synthesized with of 25 eq OAm, 21 eq OAm, 17 eq OAm, 15 eq OAm and 5 eq OAm and with purging nitrogen. The Fe2p, O1s and C1s peaks are noted, and there are additional peaks from O2s at ~22 eV and OKVV 950-1000 eV, and Fe3p ~52 eV, Fe3s ~93 eV and Fe<sub>LMM</sub> at 764-904 eV. There are also peaks that come from the background and sample preparation, such as Si2p at 99-103.5 eV, Si2s at ~153 eV, as well as P2p at ~130 eV and P2s at 190 eV, Na<sub>KLL</sub> at 497 eV and in some samples F1s at 684-689 eV.

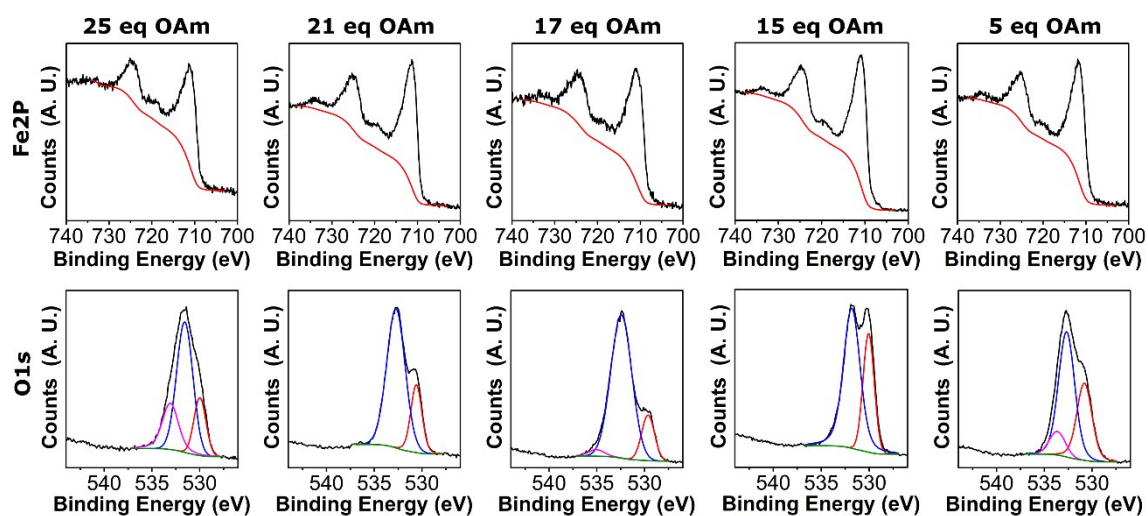

**Fig. S4** XPS Fe2p and O1s spectra of IONP synthesized with of 25 eq OAm, 21 eq OAm, 17 eq OAm, 15 eq OAm and 5 eq OAm and with purging nitrogen.

**Table S2** XPS peak positions of fits from the O1s and C1s regions, as well as the Fe2p<sub>3/2</sub> peak maximum position of 25 eq OAm, 21 eq OAm, 17 eq OAm, 15 eq OAm and 5 eq OAm synthesized with purging nitrogen.

| Peak                    | 25 eq           | 21 eq | 17 eq          | 15 eq | 5 eq            | Assignment                      |
|-------------------------|-----------------|-------|----------------|-------|-----------------|---------------------------------|
| O1s (O <sub>met</sub> ) | 530.2           | 530.5 | 530.2          | 530.5 | 530.2           | O1s O-metal                     |
| O1s                     | 531.8,<br>533.3 | 532.6 | 533.0<br>535.7 | 532.2 | 532.1,<br>533.0 | O1s organic (C-O, C=O,<br>C-OH) |
| Fe2p <sub>3/2</sub>     | 711.2           | 711.2 | 711.4          | 711.3 | 711.0           | Fe <sup>3+/2+</sup>             |
| Fe:O <sub>met</sub>     | 0.64            | 0.68  | 0.72           | 0.63  | 0.46            | Fe to metallic O Ratio          |

**Table S3** Fitting parameters for the O1s section for the particles made with 25 eq OAm, 21 eq OAm, 17 eq OAm, 15 eq OAm and 5 eq OAm synthesized with purging nitrogen. The binding energies were referenced against the position of the main component of the C1s peak set to 284.8 eV. The O1s component can be assigned with 529-531.2 eV for O-metal, and the O1s organic component with 532.5-533.5 eV for C-O, 531.5-532.0 eV for C=O, and ~535 eV for O-F<sub>x</sub>.

| Sample    | Peak                 | Peak BE (eV) | FWHM (eV) | Area (CPS. eV) |
|-----------|----------------------|--------------|-----------|----------------|
| 25 eq OAm | O1s O <sub>met</sub> | 530.2        | 1.49      | 8012.94        |
|           | O1s organic          | 531.8        | 2.01      | 24390.44       |
|           | O1s organic          | 533.3        | 1.98      | 9363.09        |
| 21 eq OAm | O1s O <sub>met</sub> | 530.5        | 1.37      | 10335.52       |
|           | O1s organic          | 532.6        | 2.26      | 34505.69       |
| 17 eq OAm | O1s O <sub>met</sub> | 530.2        | 1.59      | 6504.64        |
|           | O1s organic          | 533.0        | 2.59      | 33374.20       |
|           | O1s organic          | 535.7        | 1.92      | 1259.34        |
| 15 eq OAm | O1s O <sub>met</sub> | 530.5        | 1.37      | 15427.55       |
|           | O1s organic          | 532.2        | 2.06      | 29491.59       |
| 5 eq OAm  | O1s O <sub>met</sub> | 530.2        | 1.87      | 12677.88       |
|           | O1s organic          | 532.1        | 1.99      | 21729.14       |
|           | O1s organic          | 533.0        | 1.97      | 3908.00        |

**Table S4** Positive pressure nitrogen environment for various OAm eq.

| Oam          | Average Size / nm | Shape             |
|--------------|-------------------|-------------------|
| <b>23 eq</b> | 7 ± 1             | Spherical         |
| <b>17 eq</b> | 8 ± 2             | Spherical         |
| <b>15 eq</b> | 10 ± 3            | Spherical / Cubes |
| <b>13 eq</b> | 24 ± 5            | Spherical         |
| <b>10 eq</b> | 14 ± 2            | Cuboctahedra      |
| <b>5 eq</b>  | 6.6 ± 0.8         | Spherical         |

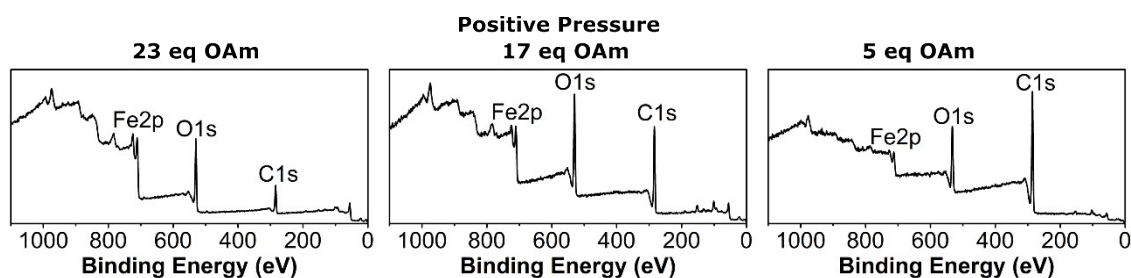

**Fig. S5** XPS survey spectra of IONP synthesized with 23 eq OAm, 17 eq OAm and 5 eq OAm without purging nitrogen. The Fe2p, O1s and C1s peaks are noted, and there are additional peaks from O2s at ~22 eV and OKVV 950-1000 eV, and Fe3p ~52 eV, Fe3s ~93 eV and Fe<sub>LMM</sub> at 764-904 eV. There are also peaks that come from the background and sample preparation, such as Si2p at 99-103.5 eV, Si2s at ~153 eV, as well as P2p at ~130 eV and P2s at 190 eV, Na<sub>KLL</sub> at 497 eV and in some samples F1s at 684-689 eV.

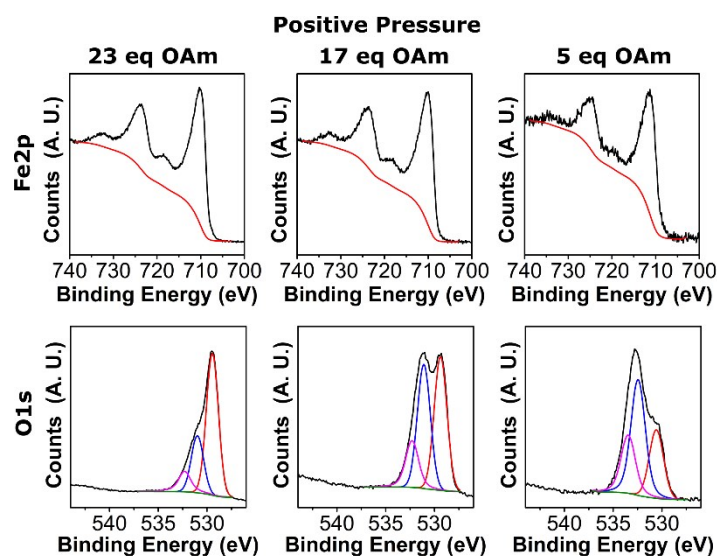

**Fig. S6** XPS Fe2p and O1s spectra of IONP synthesized with 23 eq OAm, 17 eq OAm and 5 eq OAm without purging nitrogen.

**Table S5** XPS peak positions of fits from the O1s and C1s regions, as well as the Fe2p<sub>3/2</sub> peak maximum position of 23 eq OAm, 17 eq OAm and 5 eq OAm synthesized without purging nitrogen.

| Peak                    | 23 eq           | 17 eq           | 5 eq            | Assignment                   |
|-------------------------|-----------------|-----------------|-----------------|------------------------------|
| O1s (O <sub>met</sub> ) | 530.1           | 530.2           | 530.4           | O1s O-metal                  |
| O1s                     | 531.6,<br>532.9 | 531.8,<br>532.9 | 532.3,<br>533.3 | O1s organic (C-O, C=O, C-OH) |
| Fe2p <sub>3/2</sub>     | 710.8           | 710.1           | 711.1           | Fe <sup>3+/2+</sup>          |
| Fe:O <sub>met</sub>     | 0.70            | 0.62            | 0.50            | Fe to metallic O Ratio       |

**Table S6** Fitting parameters for the O1s section for the particles made with 23 eq OAm, 17 eq OAm and 5 eq OAm synthesized without purging nitrogen. The binding energies were referenced against the position of the main component of the C1s peak set to 284.8 eV. The O1s component can be assigned with 529-531.2 eV for O-metal, and the O1s organic component with 532.5-533.5 eV for C-O, 531.5-532.0 eV for C=O, and ~535 eV for O-F<sub>x</sub>.

| Sample    | Peak                 | Peak BE (eV) | FWHM (eV) | Area (CPS. eV) |
|-----------|----------------------|--------------|-----------|----------------|
| 23 eq OAm | O1s O <sub>met</sub> | 530.1        | 1.45      | 37477.10       |
|           | O1s organic          | 531.6        | 1.48      | 15357.43       |
|           | O1s organic          | 532.9        | 1.5       | 6993.35        |
| 17 eq OAm | O1s O <sub>met</sub> | 530.2        | 1.48      | 18190.07       |
|           | O1s organic          | 531.8        | 1.75      | 17142.27       |
|           | O1s organic          | 532.9        | 1.75      | 7117.52        |
| 5 eq OAm  | O1s O <sub>met</sub> | 530.4        | 1.72      | 7289.38        |
|           | O1s organic          | 532.3        | 1.73      | 13165.50       |
|           | O1s organic          | 533.3        | 1.73      | 6853.05        |



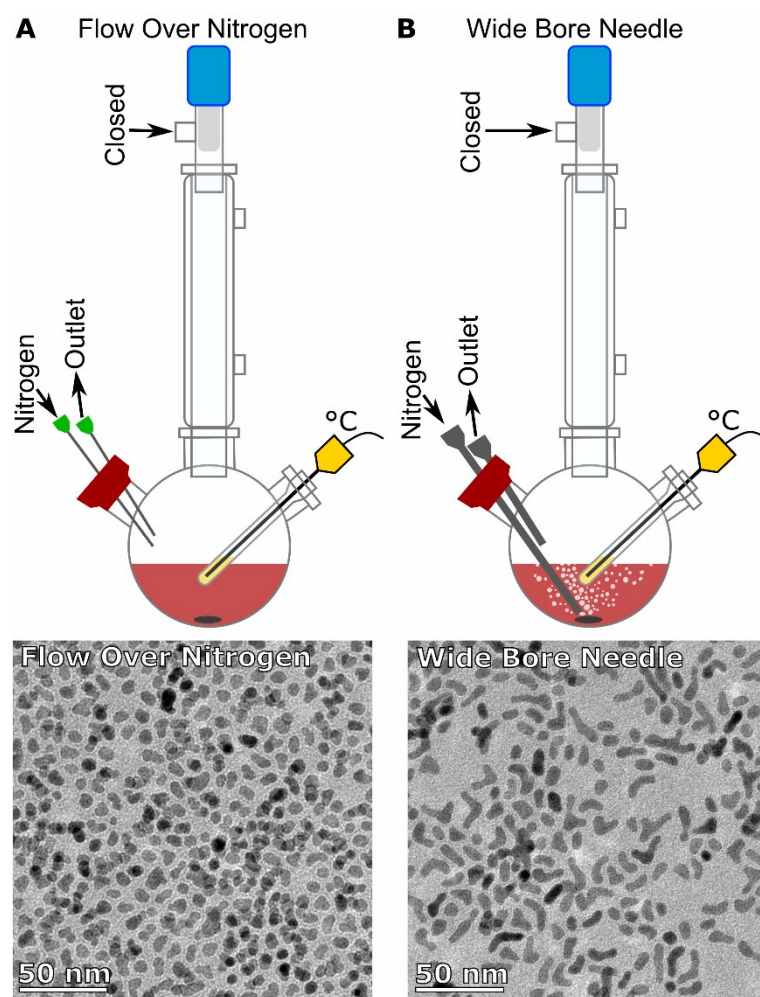

**Fig. S7** Effect of varying nitrogen flow during the reaction with 23 eq OAm and 4.5 eq HDD. A) A schematic of the set up with a needle with nitrogen flowing on the surface of the reaction solution, and the TEM image of the particles below it. B) A schematic of the set up with a wider bore entry and exit needle with increased nitrogen bubbling in the reaction mixture, and the TEM image of the particles below it.



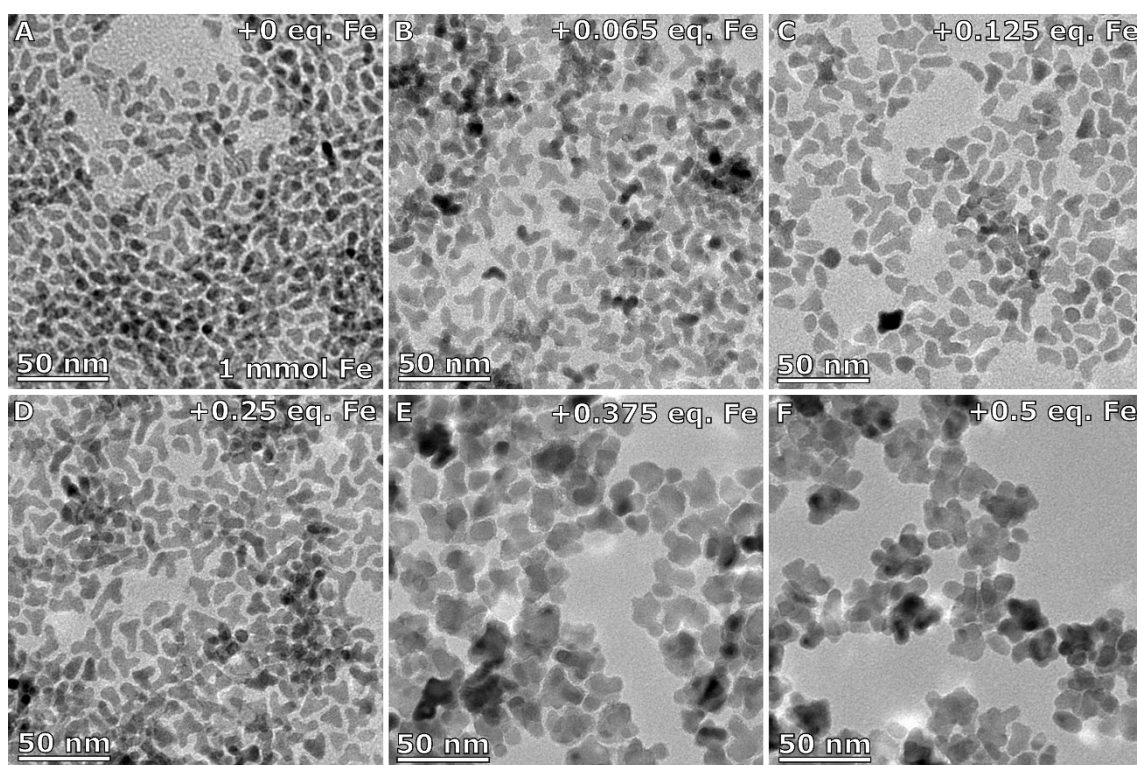

**Fig. S8** The effect of increasing the amount of iron (III) acetylacetonate in solution in a reaction mixture with standard reaction configuration (purging nitrogen, 23 eq OAm and 4.5 eq HDD). With A) the standard recipe (purging nitrogen, 23 eq OAm and 4.5 eq HDD), B) +0.065 eq Fe, C) +0.125 eq Fe, D) +0.25 eq Fe E) +0.375 eq Fe, and F) +0.5 eq Fe.

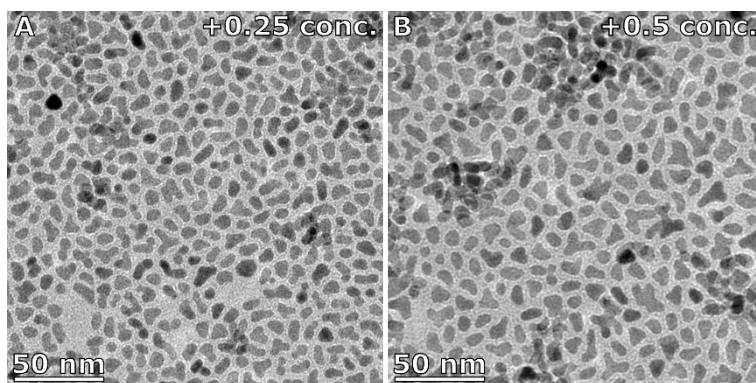

**Fig.S9** Increasing concentrations of metal precursors and surfactants by A) 25% and B) 50% from the set up with purging nitrogen, 23 eq OAm and 4.5 eq HDD. This resulted in similar branching with no significant shape anisotropy.

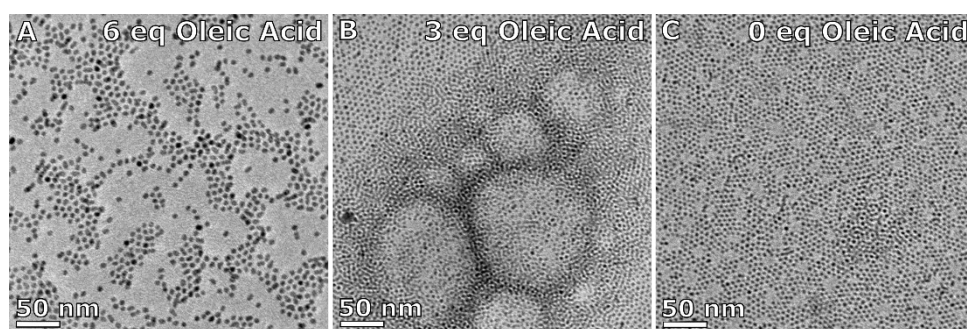

**Fig. S10** Reducing the oleic acid equivalence from the standard of 9 eq to A) 6 eq, B) 3 eq and C) 0 eq in a reaction system with purging nitrogen, 23 eq OAm and 4.5 eq HDD.

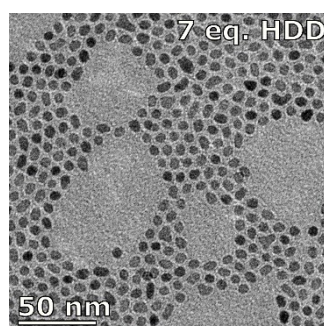

**Fig. S11** Nanoparticles formed with 7 eq HDD, 23 eq OAm and purging nitrogen.

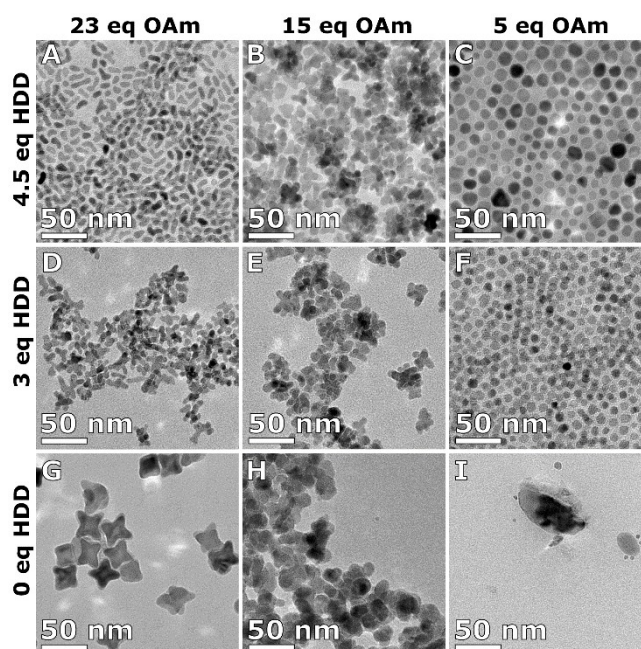

**Fig. 12** TEM images of IONPs made varying the HDD and OAm and with a constant nitrogen purge using 4.5, 3 and 0 eq HDD with 23, 15 and 5 eq OAm.

**Table S7** Average size and shapes of nanoparticles formed with varying the equivalents of HDD and OAm to the metal precursor.

| OAm   | HDD    | Shape             | Average Size / nm | Branch Width / nm |
|-------|--------|-------------------|-------------------|-------------------|
| 23 eq | 7 eq   | Elongated         | $7 \pm 1$         | $5.6 \pm 0.5$     |
| 23 eq | 4.5 eq | Branched          | $12 \pm 2$        | $5.5 \pm 0.7$     |
| 23 eq | 3 eq   | Branched          | $18 \pm 4$        | $5.3 \pm 0.9$     |
| 23 eq | 0 eq   | Octapod           | $33 \pm 4$        |                   |
| 15 eq | 4.5 eq | Multiply Branched | $17 \pm 3$        | $7 \pm 1$         |
| 15 eq | 3 eq   | Multiply Branched | $24 \pm 6$        | $7 \pm 1$         |
| 15 eq | 0 eq   | Aggregated        | $23 \pm 9$        | $13 \pm 4$        |
| 5 eq  | 4.5 eq | Octahedra         | $16 \pm 2$        |                   |
| 5 eq  | 3 eq   | Spheres           | $8 \pm 2$         |                   |
| 5 eq  | 0 eq   |                   |                   |                   |

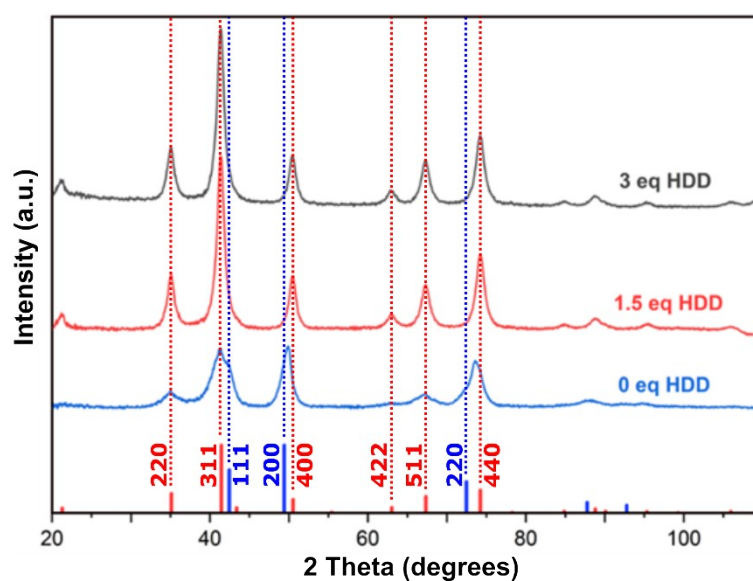

**Fig. S13** XRD patterns of IONPs made with 3 eq HDD, 1.5 eq HDD and 0 eq HDD of the series all conducted at 23 eq of OAm compared to the references of iron oxide,  $\text{Fe}_3\text{O}_4$ , (PDF: 01-075-0033) and Wüstite (PDF: 01-073-2144) as the red and blue bars and hkl values respectively which are matched to the blue and red dotted lines as guides.

**Table S8** Hyperthermia results reported in terms of SAR and ILP of the branched (25 eq OAm), and multiply branched (17 eq OAm and 15 eq OAm) nanoparticles made with constant nitrogen purge and spherical nanoparticles (10 eq OAm) made under positive pressure (PP). Experiments were conducted with a field value of 24.5 kA/m.

| Shape                         | SAR [W/g]<br>at 303 kHz | ILP [nHm <sup>2</sup> /kg]<br>at 303 kHz | SAR [W/g] at<br>488 kHz | ILP [nHm <sup>2</sup> /kg]<br>at 488 kHz |
|-------------------------------|-------------------------|------------------------------------------|-------------------------|------------------------------------------|
| Branched (25 eq OAm)          | 11                      | 0.06                                     | 37                      | 0.13                                     |
| Multiply Branched (17 eq OAm) | 28                      | 0.16                                     | 50                      | 0.11                                     |
| Multiply Branched (15 eq OAm) | 260                     | 1.42                                     | 457                     | 1.55                                     |

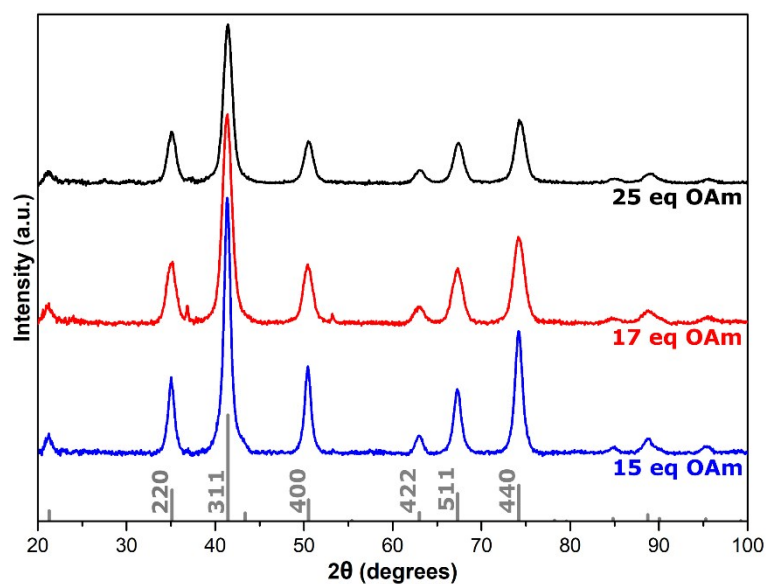

**Fig. S14** XRD patterns of the branched nanoparticles (25 eq OAm) and the two multiply branched nanoparticles (17 eq OAm and 15 eq OAm). The grey bars at the bottom are referenced to iron oxide, Fe<sub>3</sub>O<sub>4</sub>, with the hkl values in grey (PDF: 01-075-0033).

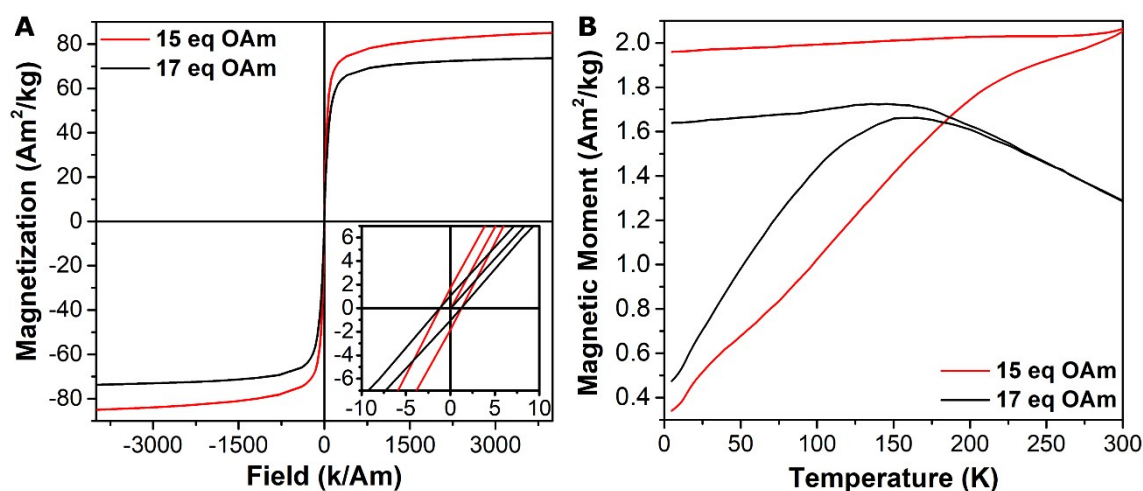

**Fig. S15** A) Magnetization curves at 300 K for the multiply branched nanoparticles (15 eq OAm and 17 eq OAm) made with constant nitrogen purge, with the inset of the hysteresis behavior. B) Zero-field cooled, field cooled curves for the multiply branched nanoparticles (15 eq OAm and 17 eq OAm).

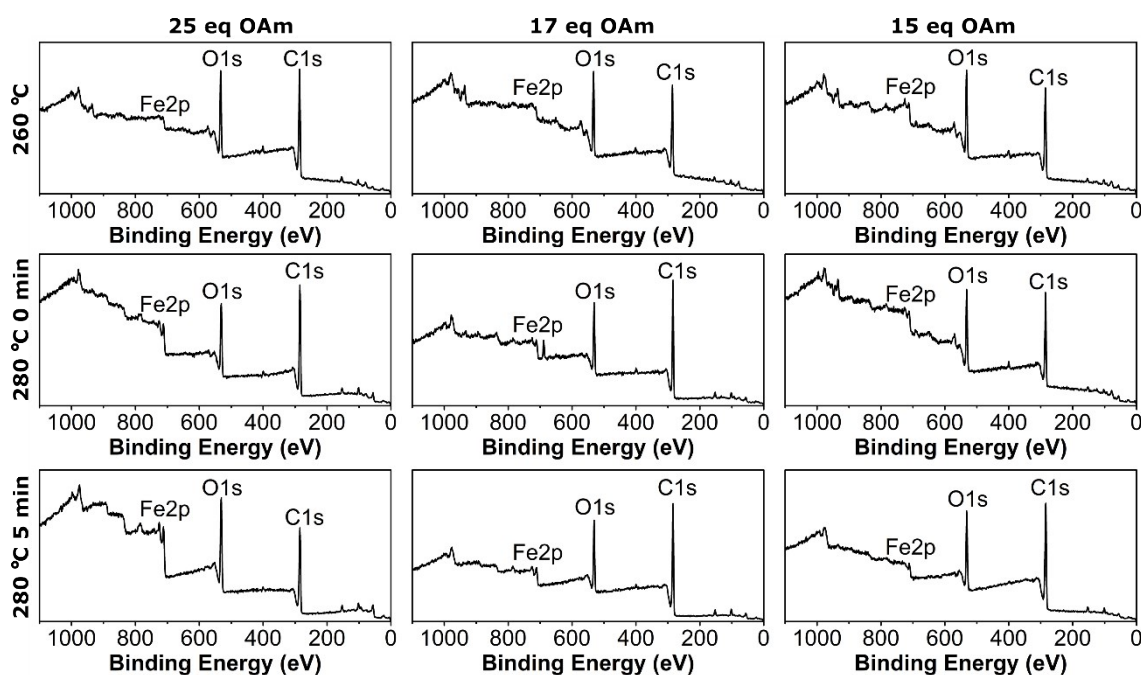

**Fig. S16** XPS survey spectra of IONP synthesized with 25 eq OAm, 17 eq OAm, and 15 eq OAm sampled at 260 °C, 280 °C 0 min and 5 min after reaching 280 °C. The Fe2p, O1s and C1s peaks are noted, and there are additional peaks from O2s at ~22 eV and O<sub>KVV</sub> 950-1000 eV, and Fe3p ~52 eV, Fe3s ~93 eV and Fe<sub>LMM</sub> at 764-904 eV. There are also peaks that come from the background and sample preparation, such as Si2p at 99-103.5 eV, Si2s at ~153 eV, as well as P2p at ~130 eV and P2s at 190 eV, Na<sub>KLL</sub> at 497 eV and in some samples F1s at 684-689 eV.



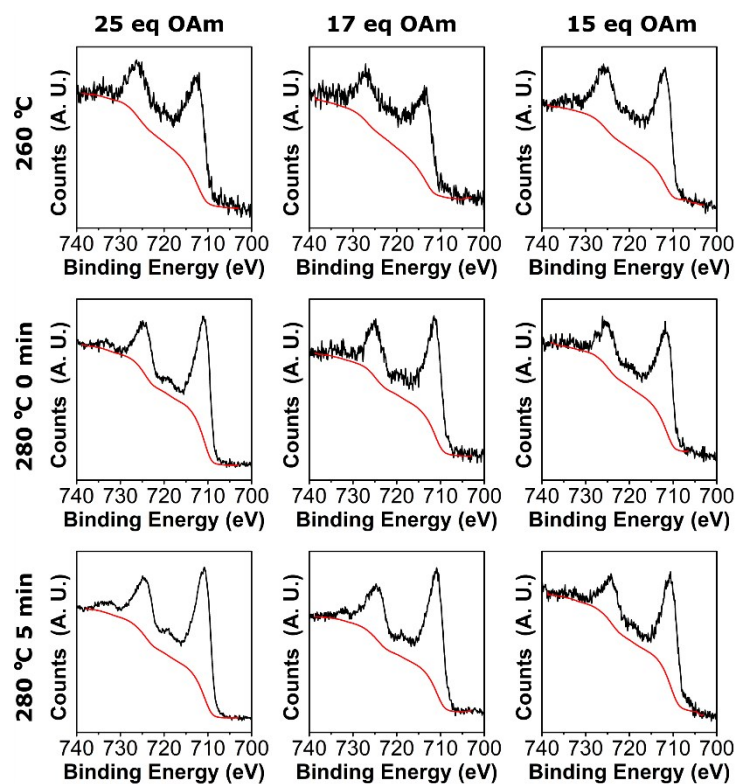

**Fig. S17** XPS Fe2p spectra of IONP synthesized with 25 eq OAm, 17 eq OAm, and 15 eq OAm sampled at 260 °C, 280 °C 0 min and 5 min after reaching 280 °C.

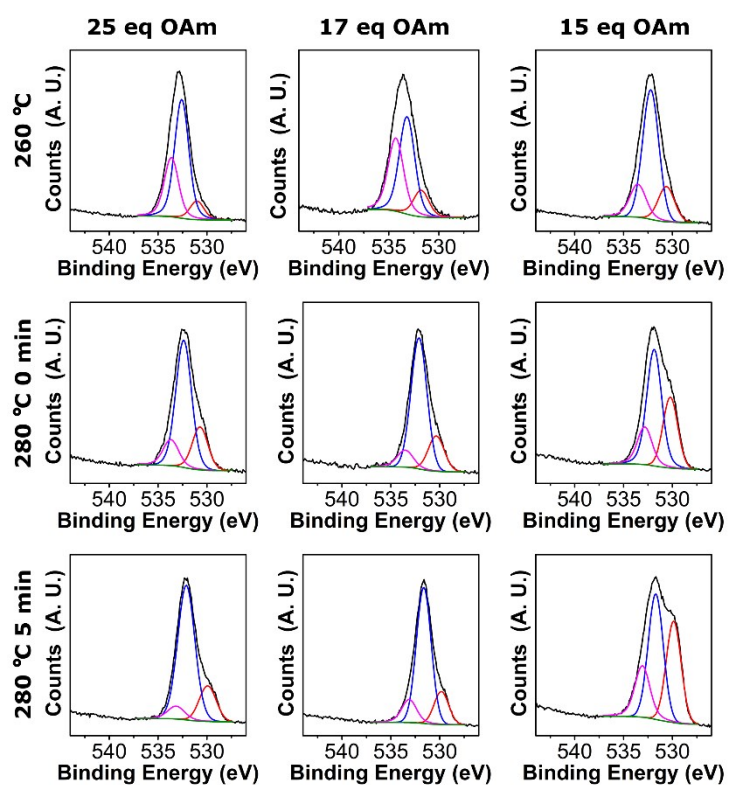

**Fig. S18** XPS O1s spectra of IONP synthesized with 25 eq OAm, 17 eq OAm, and 15 eq OAm sampled at 260 °C, 280 °C 0 min and 5 min after reaching 280 °C.



**Table S9** XPS peak positions of fits from the O1s and C1s regions, as well as the Fe2p<sub>3/2</sub> peak maximum position of IONP synthesized with 25 eq OAm, 17 eq OAm, and 15 eq OAm sampled at 260 °C, 280 °C 0 min and 5 min after reaching 280 °C. The O1s component can be assigned with 529-531.2 eV for O-Metal, and the O1s organic component with 532.5-533.5 eV for C-O, 531.5-532.0 eV for C=O, and ~535 eV for O-F<sub>x</sub>.

| OAm         | Peaks                   | 260 °C          | 280 °C 0 min    | 280 °C 5min     | Assignment                      |
|-------------|-------------------------|-----------------|-----------------|-----------------|---------------------------------|
| <b>15eq</b> | O1s (O <sub>met</sub> ) | 530.3           | 530.3           | 530.5           | O1s O-metal                     |
|             | O1s                     | 531.9,<br>533.2 | 532.0,<br>533.3 | 532.8,<br>534.0 | O1s organic (C-O,<br>C=O, C-OH) |
|             | Fe2p <sub>3/2</sub>     | 711.6           | 711.1           | 711.2           | Fe <sup>3+/2+</sup>             |
|             | Fe:O <sub>met</sub>     | 0.75            | 0.51            | 0.35            | Fe to metallic O Ratio          |
| <b>17eq</b> | O1s (O <sub>met</sub> ) | 530.3           | 530.2           | 530.2           | O1s O-metal                     |
|             | O1s                     | 531.7,<br>532.8 | 531.9,<br>533.3 | 532.0,<br>533.5 | O1s organic (C-O,<br>C=O, C-OH) |
|             | Fe2p <sub>3/2</sub>     | 712.0           | 711.1           | 711.3           | Fe <sup>3+/2+</sup>             |
|             | Fe:O <sub>met</sub>     | 0.76            | 0.62            | 0.70            | Fe to metallic O Ratio          |
| <b>25eq</b> | O1s (O <sub>met</sub> ) | 530.2           | 530.2           | 530.1           | O1s O-metal                     |
|             | O1s                     | 531.8,<br>532.8 | 531.9,<br>532.8 | 531.9,<br>533.3 | O1s organic (C-O,<br>C=O, C-OH) |
|             | Fe2p <sub>3/2</sub>     | 711.6           | 710.8           | 711.0           | Fe <sup>3+/2+</sup>             |
|             | Fe:O <sub>met</sub>     | 0.72            | 0.49            | 0.64            | Fe to metallic O Ratio          |

**Table S10** Fitting parameters for the O1s section for the particles made at 15 eq OAm at 260 °C, 280 °C at 0 min and 280 °C at 5 min. The binding energies were referenced against the position of the main component of the C1s peak set to 284.8 eV. The O1s component can be assigned with 529-531.2 eV for O-Metal, and the O1s organic component with 532.5-533.5 eV for C-O, 531.5-532.0 eV for C=O, and ~535 eV for O-F<sub>x</sub>.

| Sample                    | Peak                 | Peak BE (eV) | FWHM (eV) | Area (CPS. eV) |
|---------------------------|----------------------|--------------|-----------|----------------|
| 15 eq Oam<br>260 °C       | O1s O <sub>met</sub> | 530.3        | 1.89      | 5366.11        |
|                           | O1s organic          | 531.9        | 1.89      | 19317.37       |
|                           | O1s organic          | 533.2        | 1.89      | 5467.2         |
| 15 eq Oam<br>280 °C 0 min | O1s O <sub>met</sub> | 530.3        | 1.89      | 4538.82        |
|                           | O1s organic          | 532.0        | 1.89      | 13487.7        |
|                           | O1s organic          | 533.3        | 1.89      | 2962.4         |
| 15 eq Oam<br>280 °C 5 min | O1s O <sub>met</sub> | 530.5        | 2.02      | 6691.79        |
|                           | O1s organic          | 532.8        | 2.05      | 26033.73       |
|                           | O1s organic          | 534.0        | 2.05      | 2692.16        |

**Table S11** Fitting parameters for the O1s section for the particles made at 17 eq OAm at 260 °C, 280 °C at 0 min and 280 °C at 5 min. The O1s component can be assigned with 529-531.2 eV for O-Metal, and the O1s organic component with 532.5-533.5 eV for C-O, 531.5-532.0 eV for C=O, and ~535 eV for O-F<sub>x</sub>.

| Sample                    | Peak                 | Peak BE (eV) | FWHM (eV) | Area (CPS. eV) |
|---------------------------|----------------------|--------------|-----------|----------------|
| 17 eq Oam<br>260 °C       | O1s O <sub>met</sub> | 530.3        | 1.83      | 2161.19        |
|                           | O1s organic          | 531.7        | 1.83      | 7686.37        |
|                           | O1s organic          | 532.8        | 1.83      | 6067.82        |
| 17 eq Oam<br>280 °C 0 min | O1s O <sub>met</sub> | 530.2        | 1.75      | 3031.17        |
|                           | O1s organic          | 532.0        | 1.78      | 11061          |
|                           | O1s organic          | 533.5        | 1.78      | 1604.47        |
| 17 eq Oam<br>280 °C 5 min | O1s O <sub>met</sub> | 530.2        | 1.75      | 4995.11        |
|                           | O1s organic          | 532.0        | 1.78      | 20923.78       |
|                           | O1s organic          | 533.5        | 1.78      | 3915.94        |

**Table S12** Fitting parameters for the O1s section for the particles made at 25 eq OAm at 260 °C, 280 °C at 0 min and 280 °C at 5 min. The O1s component can be assigned with 529-531.2 eV for O-Metal, and the O1s organic component with 532.5-533.5 eV for C-O, 531.5-532.0 eV for C=O, and ~535 eV for O-F<sub>x</sub>.

| Sample                    | Peak                 | Peak BE (eV) | FWHM (eV) | Area (CPS. eV) |
|---------------------------|----------------------|--------------|-----------|----------------|
| 25 eq Oam<br>260 °C       | O1s O <sub>met</sub> | 530.2        | 1.71      | 3282.21        |
|                           | O1s organic          | 531.8        | 1.71      | 20348.76       |
|                           | O1s organic          | 532.8        | 1.71      | 10560.83       |
| 25 eq Oam<br>280 °C 0 min | O1s O <sub>met</sub> | 530.1        | 1.78      | 8914.01        |
|                           | O1s organic          | 531.9        | 1.79      | 15391.37       |
|                           | O1s organic          | 533.3        | 1.79      | 5226.06        |
| 25 eq Oam<br>280 °C 5 min | O1s O <sub>met</sub> | 530.1        | 1.79      | 14059.18       |
|                           | O1s organic          | 531.9        | 1.81      | 17657.87       |
|                           | O1s organic          | 533.3        | 1.82      | 7972.58        |

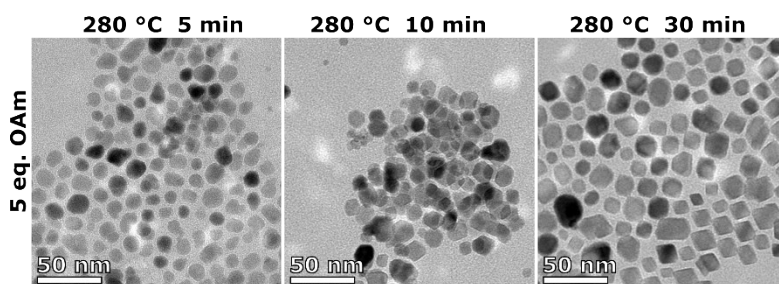

**Fig. S19** TEM images of the nanoparticles in aliquots taken from the synthesis of the octahedra (5 eq OAm) at 5 min, 10 min and 30 min at 280 °C.
